# Supplementary material for: Longitudinal analysis of naturally acquired PfEMP1 CIDR domain variant antibodies identifies associations with malaria protection
Source: JCI journal article supplement (doi:10.1172/jci.insight.137262), 2020-05-19
Supplement: sd1 [file 1]

## Supplementary Material for:

**Title:** Longitudinal analysis of naturally acquired PfEMP1 CIDR domain variant antibodies identifies associations with malaria protection

**Authors:** Nyamekye Obeng-Adjei<sup>1,2\*</sup>, Daniel B. Larremore<sup>3,4\*</sup>, Louise Turner<sup>5</sup>, Aissata Ongoiba<sup>6</sup>, Shanping Li<sup>1</sup>, Safiatou Doumbo<sup>6</sup>, Takele B. Yazew<sup>7</sup>, Kassoum Kayentao<sup>6</sup>, Louis H. Miller<sup>8</sup>, Boubacar Traore<sup>6</sup>, Susan K. Pierce<sup>7</sup>, Caroline O. Buckee<sup>9</sup>, Thomas Lavstsen<sup>5</sup>, Peter D. Crompton<sup>1</sup>, Tuan M. Tran<sup>1,10,11</sup>

\*Both authors contributed equally.

### Affiliations:

1. Malaria Infection Biology and Immunity Section, Laboratory of Immunogenetics, National Institute of Allergy and Infectious Diseases, National Institutes of Health, Rockville, Maryland, USA
2. Innate Immunity Research Unit, GlaxoSmithKline, Collegeville, Pennsylvania, USA
3. Department of Computer Science, University of Colorado Boulder, Boulder, Colorado, USA
4. BioFrontiers Institute, University of Colorado Boulder, Boulder, Colorado, 80303, USA
5. Centre for Medical Parasitology, Department of Immunology & Microbiology, University of Copenhagen and Department of Infectious Diseases, Rigshospitalet, 1017 Copenhagen, Denmark
6. Mali International Center of Excellence in Research, University of Sciences, Technique and Technology of Bamako, Bamako, Mali
7. Laboratory of Immunogenetics, National Institute of Allergy and Infectious Diseases, National Institutes of Health, Rockville, Maryland, USA
8. Laboratory of Malaria and Vector Research, National Institute of Allergy and Infectious Diseases, National Institutes of Health, Rockville, Maryland, USA
9. Center for Communicable Disease Dynamics, Department of Epidemiology, Harvard T. H. Chan School of Public Health, Boston, Massachusetts, USA
10. Division of Infectious Diseases, Department of Medicine, Indiana University School of Medicine, Indianapolis, Indiana, USA
11. Ryan White Center for Pediatric Infectious Disease and Global Health, Department of Pediatrics, Indiana University School of Medicine, Indianapolis, Indiana, USA

**Table S1. Antigens tested in multiplex immunoassay.**

| Original Antigen Labels | Figure Labels          | Group   | Binding Phenotype | Genome/ Isolate | Domain Class      | Name used in figures of Rambathia et al PMID. 30365003 |
|-------------------------|------------------------|---------|-------------------|-----------------|-------------------|--------------------------------------------------------|
| HB3var03                | CIDR $\alpha$ 1.4 (a)  | A       | EPCR              | HB3             | CIDR $\alpha$ 1   | $\alpha$ 1.4 (a)                                       |
| IT4var7                 | CIDR $\alpha$ 1.4 (b)  | A       | EPCR              | IT4             | CIDR $\alpha$ 1   | $\alpha$ 1.4 (b)                                       |
| X1965_2                 | CIDR $\alpha$ 1.5a (a) | A       | EPCR              | 1965            | CIDR $\alpha$ 1   | $\alpha$ 1.5a (a)                                      |
| ERS010323               | CIDR $\alpha$ 1.5a (b) | A       | EPCR              | GA013           | CIDR $\alpha$ 1   | $\alpha$ 1.5a (b)                                      |
| ERS01002                | CIDR $\alpha$ 1.5a (c) | A       | EPCR              | GA014           | CIDR $\alpha$ 1   | $\alpha$ 1.5a (c)                                      |
| X198_5                  | CIDR $\alpha$ 1.5b (a) | A       | unknown           | 1918            | CIDR $\alpha$ 1   | $\alpha$ 1.5b (a)                                      |
| X198313                 | CIDR $\alpha$ 1.5b (b) | A       | unknown           | 1983            | CIDR $\alpha$ 1   | $\alpha$ 1.5b (b)                                      |
| HB3var02                | CIDR $\alpha$ 1.6a     | A       | EPCR              | HB3             | CIDR $\alpha$ 1   | $\alpha$ 1.6a                                          |
| ERS01057                | CIDR $\alpha$ 1.6b (a) | A       | EPCR              | GA018           | CIDR $\alpha$ 1   | $\alpha$ 1.6b (a)                                      |
| ERS01003                | CIDR $\alpha$ 1.6b (b) | A       | EPCR              | GA019           | CIDR $\alpha$ 1   | $\alpha$ 1.6b (b)                                      |
| X1965_8                 | CIDR $\alpha$ 1.7 (a)  | A       | EPCR              | 1965            | CIDR $\alpha$ 1   | $\alpha$ 1.7 (a)                                       |
| X1918_3                 | CIDR $\alpha$ 1.7 (b)  | A       | EPCR              | 1918            | CIDR $\alpha$ 1   | $\alpha$ 1.7 (b)                                       |
| ERS01043                | CIDR $\alpha$ 1.7 (c)  | A       | EPCR              | GA024           | CIDR $\alpha$ 1   | $\alpha$ 1.7 (c)                                       |
| IT4var08                | CIDR $\gamma$ 3        | A       | unknown           | IT4             | CIDR $\gamma$     | $\gamma$                                               |
| HB3var05                | CIDR $\delta$ (a)      | A       | unknown           | HB3             | CIDR $\delta$     | $\delta$ (a)                                           |
| HB3var35                | CIDR $\delta$ (b)      | A       | unknown           | HB3             | CIDR $\delta$     | $\delta$ (b)                                           |
| IT4var02                | CIDR $\delta$ (c)      | A       | unknown           | IT4             | CIDR $\delta$     | $\delta$ (c)                                           |
| IT4var30                | CIDR $\alpha$ 2.10     | B       | CD36              | IT4             | CIDR $\alpha$ 2-6 | $\alpha$ 2.10                                          |
| IT4var24                | CIDR $\alpha$ 2.2      | B       | CD36              | IT4             | CIDR $\alpha$ 2-6 | $\alpha$ 2.2                                           |
| IT4var33                | CIDR $\alpha$ 2.4      | B       | CD36              | IT4             | CIDR $\alpha$ 2-6 | $\alpha$ 2.4                                           |
| IT4var61                | CIDR $\alpha$ 2.7      | B       | CD36              | IT4             | CIDR $\alpha$ 2-6 | $\alpha$ 2.7                                           |
| IT4var45                | CIDR $\alpha$ 2.9      | B       | CD36              | IT4             | CIDR $\alpha$ 2-6 | $\alpha$ 2.9                                           |
| DD2var01                | CIDR $\alpha$ 3.1 (a)  | B       | CD36              | DD2             | CIDR $\alpha$ 2-6 | $\alpha$ 3.1 (a)                                       |
| HB3var27                | CIDR $\alpha$ 3.1 (b)  | B       | CD36              | HB3             | CIDR $\alpha$ 2-6 | $\alpha$ 3.1 (b)                                       |
| IT4var21                | CIDR $\alpha$ 3.1 (c)  | B       | CD36              | IT4             | CIDR $\alpha$ 2-6 | $\alpha$ 3.1 (c)                                       |
| IT4var26                | CIDR $\alpha$ 3.3      | B       | CD36              | IT4             | CIDR $\alpha$ 2-6 | $\alpha$ 3.3                                           |
| IT4var15                | CIDR $\alpha$ 3.5      | B       | CD36              | IT4             | CIDR $\alpha$ 2-6 | $\alpha$ 3.5                                           |
| IT4var14                | CIDR $\alpha$ 5        | B       | CD36              | IT4             | CIDR $\alpha$ 2-6 | $\alpha$ 5                                             |
| IT4var12                | CIDR $\alpha$ 6        | B       | CD36              | IT4             | CIDR $\alpha$ 2-6 | $\alpha$ 6                                             |
| IT4var20                | CIDR $\alpha$ 1.1 (a)  | B/A     | EPCR              | IT4             | CIDR $\alpha$ 1   | $\alpha$ 1.1 (a)                                       |
| igh_var19               | CIDR $\alpha$ 1.1 (b)  | B/A     | EPCR              | IGH             | CIDR $\alpha$ 1   | $\alpha$ 1.1 (b)                                       |
| raj116_var              | CIDR $\alpha$ 1.1 (c)  | B/A     | EPCR              | raj116          | CIDR $\alpha$ 1   | $\alpha$ 1.1 (c)                                       |
| ERS010178_NODE_17       | CIDR $\alpha$ 1.8a     | B/A     | EPCR              | GA026           | CIDR $\alpha$ 1   | $\alpha$ 1.8a                                          |
| X2053_3                 | CIDR $\alpha$ 1.8b (a) | B/A     | EPCR              | GA027           | CIDR $\alpha$ 1   | $\alpha$ 1.8b (a)                                      |
| ERS010532_NODE_326      | CIDR $\alpha$ 1.8b (c) | B/A     | EPCR              | GA029           | CIDR $\alpha$ 1   | $\alpha$ 1.8b (c)                                      |
| AMA1                    | AMA1                   | non-var | N/A               | N/A             | AMA1              | N/A                                                    |
| BSA                     | BSA                    | non-var | N/A               | N/A             | BSA               | N/A                                                    |
| CSP                     | CSP                    | non-var | N/A               | N/A             | CSP               | N/A                                                    |
| MSP1                    | MSP1                   | non-var | N/A               | N/A             | MSP1              | N/A                                                    |
| tetanus toxoid          | tetanus toxoid         | non-var | N/A               | N/A             | tetanus           | N/A                                                    |

Listed antigens were used in a multiplex bead-based immunoassay to determine antigen-specific IgG reactivity of plasma from participants in the Kalifabougou cohort. Bovine serum albumin (BSA) and tetanus toxoid were used as controls for non-specific cross-reactivity and the predictable response to tetanus vaccination, respectively.

**Table S2. Differential acquisition of CIDR domain class-specific IgG antibodies with age and/or malaria exposure.**

| Domain Class      | n   | PfEMP1 group | Binding Phenotype | Slope for domain class | Coefficient (age:domain class interaction term) | Standard error | t     | P value  | BH-adjusted P value |
|-------------------|-----|--------------|-------------------|------------------------|-------------------------------------------------|----------------|-------|----------|---------------------|
| CIDR $\gamma$     | 340 | A            | unknown           | 0.224                  | 0.0485                                          | 0.0134         | 3.63  | 0.000283 | 0.00141             |
| CIDR $\delta$     | 340 | A            | unknown           | 0.209                  | 0.0357                                          | 0.00796        | 4.49  | <0.0001  | <0.0001             |
| CIDR $\alpha$ 1   | 340 | A            | EPCR              | 0.208                  | 0.0682                                          | 0.00435        | 15.7  | <0.0001  | <0.0001             |
| CIDR $\alpha$ 2-6 | 340 | B            | CD36              | 0.115                  | -0.0935                                         | 0.00446        | -21.0 | <0.0001  | <0.0001             |

Refers to Figure 3B. To determine CIDR domain classes for which specific IgG was acquired more rapidly than the other variants, the change in variant-specific IgG reactivity with age was compared between all variants within each CIDR domain class and all other variants. Specifically, for each CIDR domain class, a linear regression model was performed for children <8 years of age, which represents the linear portion of the plot. The dependent variable was log-transformed antigen-specific IgG reactivity; the independent variables were presence of *P. falciparum* parasitemia (determined by PCR), age, and PfEMP-1 variant type dichotomized as the PfEMP-1 domain class of interest or variants in all other domain classes with the latter being the reference level. An interaction between age and CIDR class was included in the model. Tabulated coefficient and statistics are for the age:domain class interaction term. P values were adjusted for multiple testing (5 coefficients per model times 4 domain classes) using the Benjamini-Hochberg (BH) method. Non-PfEMP-1 antigens were not included in the analysis.

**Table S3. Pairwise comparison of slopes between CIDR classes.**

| Domain class 1    | Domain class 2  | F statistic | P value   |
|-------------------|-----------------|-------------|-----------|
| CIDR $\alpha$ 1   | CIDR $\gamma$   | 1.3852      | 0.2393    |
| CIDR $\alpha$ 2-6 | CIDR $\gamma$   | 88.663      | < 2.2e-16 |
| CIDR $\delta$     | CIDR $\gamma$   | 0.816       | 0.3665    |
| CIDR $\alpha$ 1   | CIDR $\delta$   | 0.0333      | 0.8552    |
| CIDR $\alpha$ 2-6 | CIDR $\delta$   | 164.38      | < 2.2e-16 |
| CIDR $\alpha$ 2-6 | CIDR $\alpha$ 1 | 415.19      | < 2.2e-16 |

Refers to Figure 3B. To determine if the slopes for IgG reactivity between each CIDR domain classes were significantly different from each other in a pairwise manner, we compared a simple linear model in which the slopes of any two CIDR domain classes were parallel to a more complex linear model that included an interaction between age and CIDR domain class using analysis of variance tables. For these models, the predictor variable was IgG reactivity (as log<sub>10</sub> arbitrary units) and independent variables were age, *P. falciparum* PCR status at baseline, and domain class as two-level factor variable. Analysis was limited to children <8 years of age (n = 340). A P value < 0.05 indicates that the slopes for the two domain classes are significantly different.

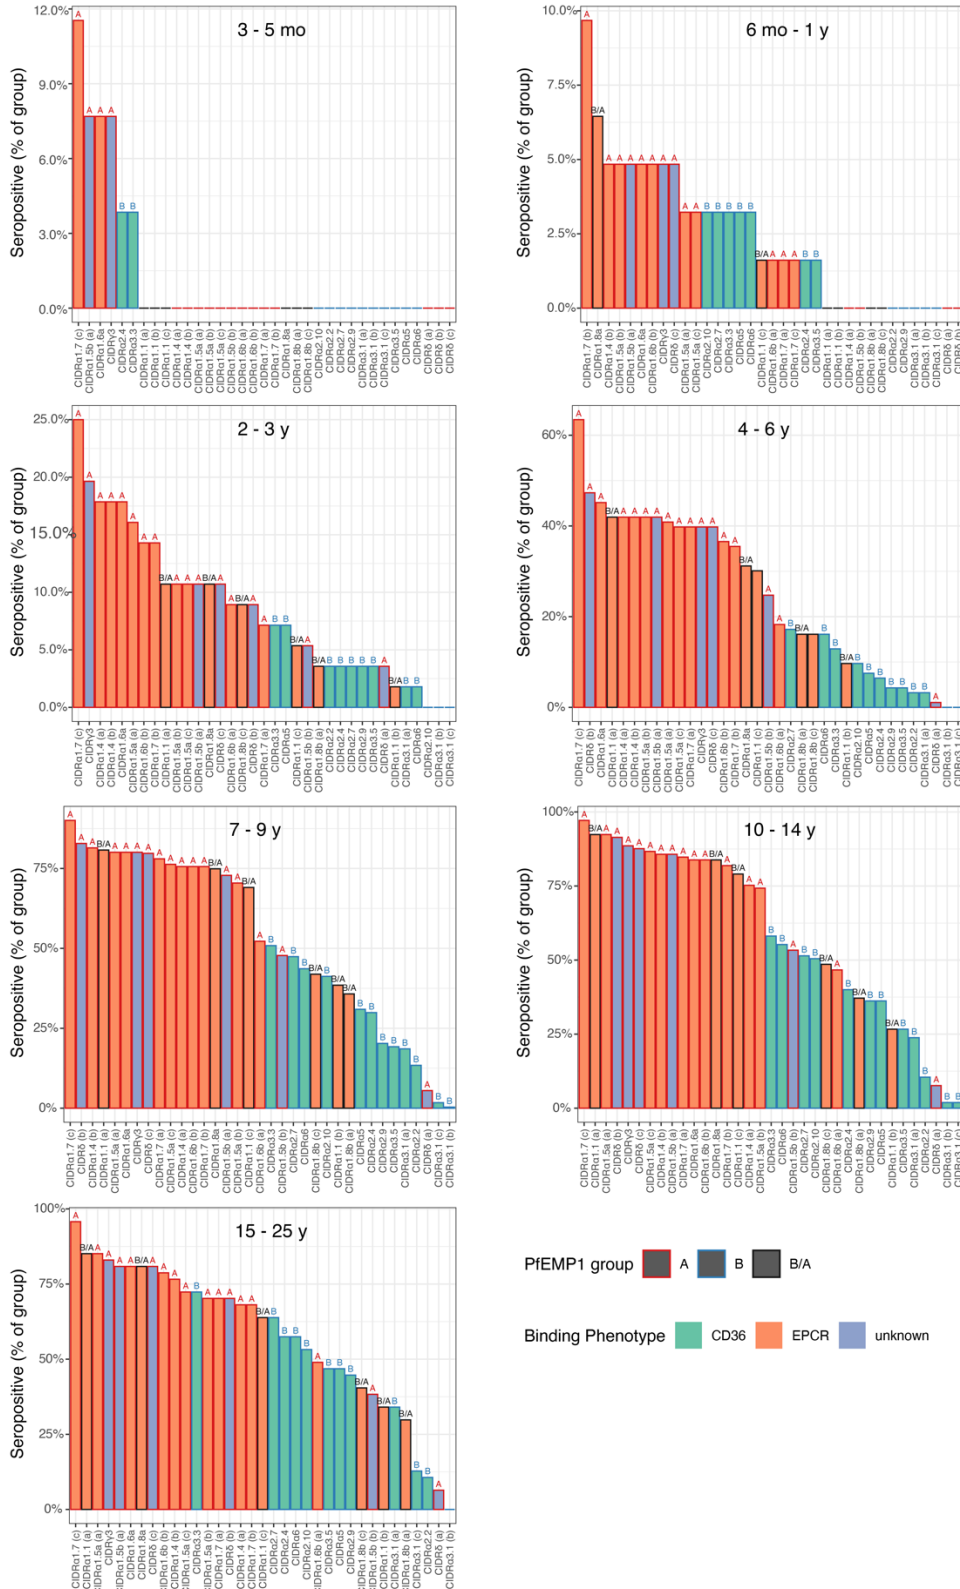

**Fig. S1. Antibodies specific for group A and EPCR-binding phenotypes are acquired earlier in life.**

Antigens were ranked by seroprevalence to determine the dominant antibody responses for each age group. A response was considered seropositive if the antigen-specific IgG reactivity was greater than the mean reactivity of 20 malaria-naive US donors plus 3 standard deviations.

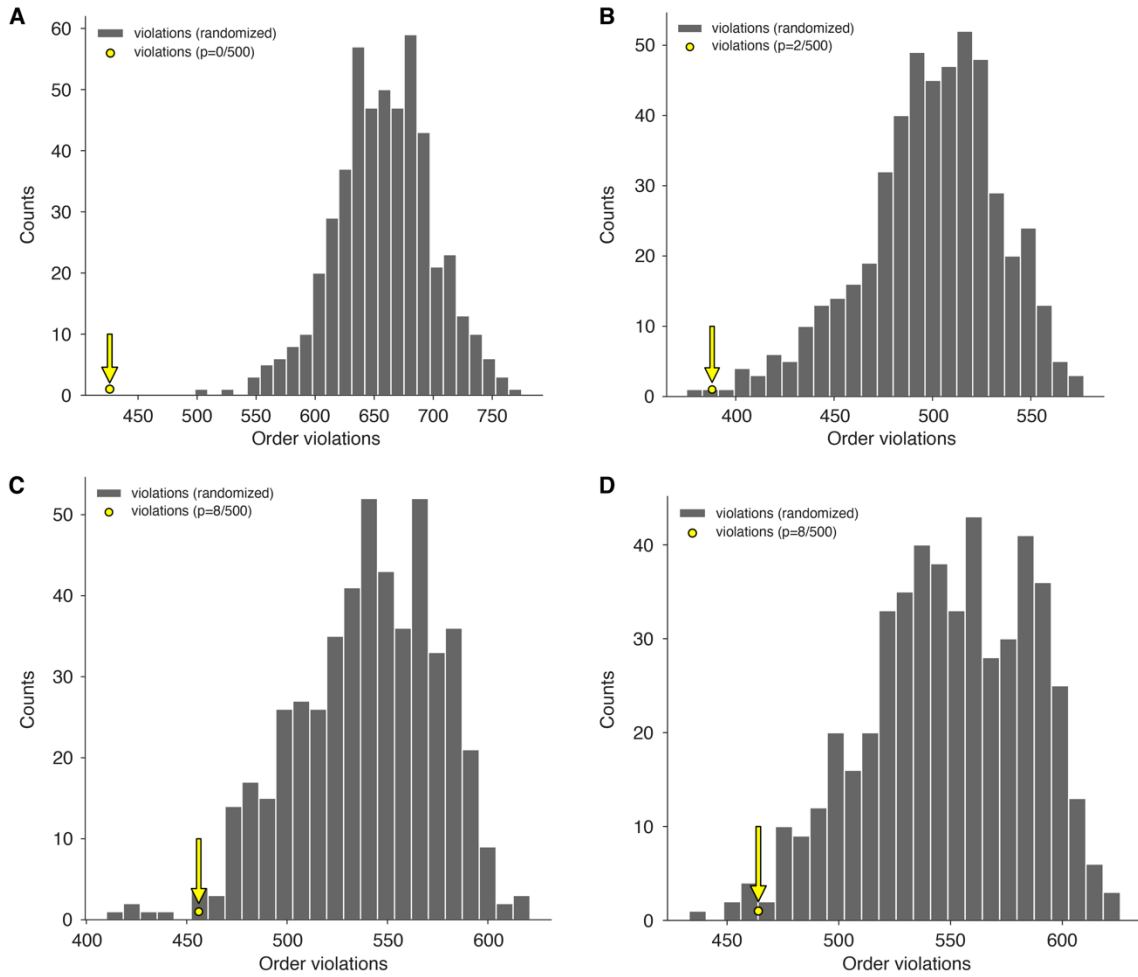

**Fig. S2. Significance testing for consensus ordering.**

Related to Fig. 5. Observed consensus ordering was compared against 200 independent procedures in which the seroconversion orders for each subject was randomized and consensus ordering was carried out in the same manner, using the total count of consensus-violating seroconversions as a test-statistic (right panel). Fewer consensus violations in real data than in randomized data implies the reported seroconversion ordering is statistically significant. Analysis was performed at the level of **A** individual variants, **B** CIDR domain class, **C** upstream sequence group, and **D** binding phenotype.

**Table S4. Relationship between CIDRy3 seropositivity and protection from febrile malaria with inclusion of blood group O as a co-variate.**

| Covariate              | without group O covariate |       |       |          | with group O covariate |       |       |          |
|------------------------|---------------------------|-------|-------|----------|------------------------|-------|-------|----------|
|                        | HR                        | LCI   | UCI   | P value  | HR                     | LCI   | UCI   | P value  |
| Age                    | 1.07                      | 0.998 | 1.14  | 0.0582   | 1.07                   | 0.999 | 1.14  | 0.055    |
| CIDRy3                 | 0.411                     | 0.276 | 0.613 | 1.26E-05 | 0.407                  | 0.274 | 0.605 | 8.73E-06 |
| group O blood type     |                           |       |       |          | 0.963                  | 0.678 | 1.37  | 0.831    |
| Male                   | 0.858                     | 0.605 | 1.22  | 0.39     | 0.859                  | 0.606 | 1.22  | 0.395    |
| presence of HbS allele | 0.53                      | 0.311 | 0.903 | 0.0196   | 0.529                  | 0.311 | 0.902 | 0.0194   |

Results of Cox regression models assessing CIDRy3-specific IgG on the risk of febrile malaria after incident *P. falciparum* infection in which covariates were age, gender, presence of the HbS allele, and AMA1-specific IgG reactivity without or with group O blood type. Analysis was restricted to children within the cohort who were at least 6 months of age, began the study negative for *P. falciparum* infection by PCR, and had ABO blood typing performed (218 subjects; 140 malaria events). Malaria risk was determined based on time to clinical malaria, defined as axillary temperature  $>37.5^{\circ}$  C and any parasitemia, once parasitemia was detected by PCR. Results are ordered by increasing significance values.
